# Supplementary material for: Rapid solidification for green-solvent-processed large-area organic solar modules with >16% efficiency
Source: Royal Society of Chemistry journal article supplement (doi:10.1039/d4ee00680a), 2024-01-01
Supplement: d4ee00680a1.pdf [file d4ee00680a1.pdf]

## Supporting Information

### Rapid Solidification for Green-Solvent-Processed Large-Area Organic Solar Modules with >16% Efficiency

Ben Zhang,<sup>a</sup> Weijie Chen,<sup>a</sup> Haiyang Chen,<sup>a</sup> Guang Zeng,<sup>a</sup> Rui Zhang,<sup>d</sup> Hongxiang Li,<sup>e</sup> Yunfei Wang,<sup>f</sup> Xiaodan Gu,<sup>f</sup> Weiwei Sun,<sup>a</sup> Hao Gu,<sup>a</sup> Feng Gao,<sup>d</sup> Yaowen Li,<sup>a,b,c,\*</sup> and Yongfang Li<sup>a,b,g</sup>

<sup>a</sup> Laboratory of Advanced Optoelectronic Materials, Suzhou Key Laboratory of Novel Semiconductor-optoelectronics Materials and Devices, College of Chemistry, Chemical Engineering and Materials Science, Soochow University, Suzhou 215123, China

Email: ywli@suda.edu.cn

<sup>b</sup> Jiangsu Key Laboratory of Advanced Negative Carbon Technologies, Soochow University, Suzhou 215123, China

<sup>c</sup> State and Local Joint Engineering Laboratory for Novel Functional Polymeric Materials, Jiangsu Key Laboratory of Advanced Functional Polymer Design and Application, College of Chemistry, Chemical Engineering and Materials Science, Soochow University, Suzhou 215123, China

<sup>d</sup> Department of Physics, Chemistry and Biology (IFM), Linköping University, Linköping SE-58183, Sweden

<sup>e</sup> College of Polymer Science and Engineering, State Key Laboratory of Polymer Materials Engineering, Sichuan University, Chengdu 610065, China

<sup>f</sup> School of Polymer Science and Engineering, Center for Optoelectronic Materials and Devices, The University of Southern Mississippi, Hattiesburg, Mississippi 39406, United States

<sup>g</sup> Beijing National Laboratory for Molecular Sciences; CAS Key Laboratory of Organic Solids, Institute of Chemistry, Chinese Academy of Sciences, Beijing 100190, China

## Experimental Section

### 1. Materials

Indium-tin-oxide (ITO) glass was purchased from South China Xiang Science and Technology Company Ltd. Zinc acetate dihydrate ( $\text{Zn}(\text{CH}_3\text{COO})_2 \cdot 2\text{H}_2\text{O}$ , 98%) was purchased from Sigma-Aldrich. Aluminum nitrate ( $\text{Al}(\text{NO}_3)_3 \cdot 9\text{H}_2\text{O}$ , 99.99%) and ethylene glycol (EG, 99%) were purchased from Aladdin. Toluene (PhMe), *o*-xylene (*o*-XY), and 1,2,4-trimethyl-benzene were purchased from J&K Scientific. PEDOT:PSS (Heraeus Clevis PVPA 4083) was purchased from Heraeus. The polymer donor PM6, D18 and non-fullerene acceptor L8-BO were purchased from Solarmer materials Ltd. All of the materials were used as received without further purification.

### 2. Device fabrication

Small-area device fabrication: The OSCs were fabricated with an inverted structure of ITO/AZO/Active layer/ $\text{MoO}_3$ /Al. ITO-coated glass substrates were rinsed with deionized water, acetone, and isopropyl alcohol by ultrasonication, sequentially, and then dried with  $\text{N}_2$ . After that, the AZO layer was blade-coated on top of ITO substrate with a coating velocity of 10 mm/s and gap height of 200  $\mu\text{m}$  in the air and then dried at 140°C for 20 min. The active layer solution was prepared with PM6:D18:L8-BO ratios of 0.8:0.2:1.2 (w/w, 5.6 mg/mL of PM6) in PhMe with 1,4-diiodobenzene (DIB) as a solid additive (the content of DIB is 50% of the total mass of donor and acceptor). Then the active layer solution was stirred at 80°C for 6 hours to ensure complete dissolution, followed by stirring at 25°C for 2 hours. Subsequently, the PM6:D18:L8-BO blend film was blade-coated in the ambient atmosphere onto the AZO layer at a blade-coated speed of 7 mm/s, and thermally annealed at 85°C for 5 min. For RS processing, the blend film is immediately dried by  $\text{N}_2$  after the blade-coating. Finally, a  $\text{MoO}_3$  layer (10 nm) and an Al film (100 nm) were thermally deposited on the active layer by vacuum evaporation under  $3 \times 10^{-4}$  Pa.

Large-area (5×5 cm<sup>2</sup>) module fabrication: The module was fabricated with a similar device architecture to the small-area OSCs. The series interconnection of the module was realized by P1, P2, and P3 lines, which were patterned using a laser etching system

with a GH-LS300. The gap between each ITO pattern is defined as P1 with a width of 30  $\mu\text{m}$ . The patterned ITO-coated glass substrates ( $5\times 5\text{ cm}^2$ ) were rinsed, which was followed by depositing the AZO, active layer, and  $\text{MoO}_3$  layer were fabricated as depicted before. Then the organic layers were partially removed by high-resolution short-pulse laser for subsequent serial interconnection of the individual cell (the width of P2 line is around 140  $\mu\text{m}$ ). Finally, an Al electrode (100 nm) was deposited on  $\text{MoO}_3$  layer by vacuum evaporation and the P3 (80  $\mu\text{m}$ ) line was formed to complete the module and make the Al to ITO interconnection between adjacent cells.

Large-area ( $10\times 10\text{ cm}^2$ ) module fabrication: The  $10\times 10\text{ cm}^2$  module was fabricated using the same device process to the  $5\times 5\text{ cm}^2$  OSC module, which consists of sixteen sub-cells ( $9.0\times 0.5\text{ cm}^2$ ) monolithically in series. The width of dead area is 0.42  $\mu\text{m}$ , and the geometric fill factor of module is about 92.2%.

### **3. Electrical measurements**

The  $J-V$  characteristics of the devices were measured with a computer-controlled Keithley 2400 Source Measure Unit under AM 1.5G illumination ( $100\text{ mW cm}^{-2}$ ) from a SS-F5-3A solar simulator (Enli Technology). The light intensity was calibrated by a standard silicon solar cell (SRC-00178, calibrated by Enli Technology) before testing. The EQE spectra were obtained using a solar cell spectral response measurement system (Enli Technology Co., Ltd., QE-R3011). The light intensity at each wavelength was also calibrated with a standard silicon solar cell (RCS103011-E, calibrated by Enli Technology).

### **4. UV-visible absorption spectra measurements**

The absorption spectra were measured with an ultraviolet spectrometer (Agilent Technologies Cary 5000 UV-vis-NIR).

### **5. *In-situ* UV-visible absorption spectra measurements**

*In-situ* UV-vis absorption measurements were performed by the Optosky spectrometer using the transmission mode. The minimum integration time was 20 ms with automatic

recoded spectra every 25 ms.

## **6. LBIC mapping measurements**

The LBIC mapping measurements were carried out by using Professional LBIC (InfinityPV ApS). The system was equipped with a 635 nm laser and 2D/3D LBIC image function.

## **7. Morphology characterization**

AFM images were measured on an atomic force microscope (Bruker Nanoscope V) and TEM images were measured on a FEI Tecna G2 F20.

## **8. 2D GIWAXS measurements**

The samples were prepared on Si substrates using identical conditions with the device fabrication. The 2D GIWAXS measurement was conducted at beamline 7.3.3 at the Advanced Light Source at Lawrence Berkeley National Lab (Berkeley, USA). The samples were illuminated with 10 keV radiation ( $\lambda = 1.24 \text{ \AA}$ ) at an incident angle ( $\alpha_i$ ) of  $0.12^\circ$ . The beam size was  $300 \text{ }\mu\text{m}$  (height)  $\times$   $700 \text{ }\mu\text{m}$  (width). The scattering signal was captured on a Pilatus 2M ( $172 \text{ }\mu\text{m}$  pixel size, file format EDF,  $1475 \times 1679$  pixels) located 282 mm from the sample. The GIWAXS data in Fig. S8 were obtained at beamline BL02U2 of Shanghai Synchrotron Radiation Facility (SSRF). The monochromatic of the light source was  $1.24 \text{ \AA}$ . The data were recorded by using the two-dimensional image plate detector of Pilatus 2M from Dectris, Switzerland. The crystal coherence length (CCL) was calculated by using the Scherrer equation:

$$CCL = \frac{2\pi K}{\Delta q}$$

Where  $K$  is the shape factor ( $K = 0.9$ ), and  $\Delta q$  is the full-width at half-maximum (FWHM) of the diffraction peak.

## **9. Stability measurements**

Operational stability measurements of the OSCs were conducted by using the white

light LED array under continuous illumination of the simulating intensity of 100 mW cm<sup>-2</sup> (spectral region: 410-850 nm, Suzhou D & R Instruments, PVL-T-G8001M-32B) at MPP (N<sub>2</sub> atmosphere, temperature around 45-55°C) and the currents were recorded over time with the Keithley 2400 source meter.

## 10. Marangoni number calculation

The Marangoni number ( $Ma$ ) was used to evaluate the strength of the Marangoni effect. The surface tension values of the PM6:D18:L8-BO films were determined via contact angle measurement.  $\Delta T$  is calculated by the temperature difference between the bottom and top of the wet film, which is determined by subtracting room temperature from different substrate temperatures. The thickness of wet film was calculated from the solution volume (22  $\mu$ L) and the ITO glass area (1.5×1.5 cm<sup>2</sup>).<sup>1</sup> Solution viscosities at different temperatures were measured with a viscometer. The thermal diffusivity  $\alpha = k/(\rho C_p)$ , where  $k$ ,  $\rho$ , and  $C_p$  are thermal conductivity, density, and specific heat capacity of the toluene solvent, respectively. The relevant parameters can be accessed through the National Institute of Standards and Technology (NIST) database at <https://webbook.nist.gov/chemistry/fluid/>.

## 11. Electroluminescence quantum efficiency measurements

The electroluminescence quantum efficiency (EQE<sub>EL</sub>) values were recorded with an electroluminescence measurement system (VLAS, LightSkytech) with a Hamamatsu silicon photodiode 1010B. A Keithley 2400 was used for supplying bias voltages and recording injected current, and a Keithley 485 was used for collecting the photocurrent generated from the emitted photons of the samples.

## 12. Contact angle measurement and calculation of surface tension

Contact angles were measured on an Attension Theta Optical tensiometer (Biolin Scientific) at room temperature. The surface tension value was calculated according to the following equation:

$\gamma_{LV}(1 + \cos \theta) = 2\sqrt{\gamma_{SV}^d \gamma_{LV}^d} + 2\sqrt{\gamma_{SV}^p \gamma_{LV}^p}$ , where  $\gamma_{SV}^d$  and  $\gamma_{LV}^d$  represent the dispersion part of the surface tension between solid-air and liquid-air, respectively.  $\gamma_{SV}^p$  and  $\gamma_{LV}^p$  represent the polar part of the surface tension between solid-air and liquid-air, respectively. The surface tensions of water and diiodomethane are  $72.8 \text{ mN m}^{-1}$  ( $\gamma_{LV}^p = 50.7 \text{ mN m}^{-1}$  and  $\gamma_{LV}^d = 22.1 \text{ mN m}^{-1}$ ) and  $50.8 \text{ mN m}^{-1}$  ( $\gamma_{LV}^p = 6.7 \text{ mN m}^{-1}$  and  $\gamma_{LV}^d = 44.1 \text{ mN m}^{-1}$ ). And

$$\gamma_{SV} = \gamma_{SV}^d + \gamma_{SV}^p$$

#### Supplementary discussion 1: Mechanism related to the direction of surface tension

The fundamental reason for surface tension is the uneven distribution of interaction forces at the gas-liquid interface. Solvent molecules in a liquid are categorized into those residing within the liquid bulk and those at the gas-liquid interface. Molecules within the liquid bulk are subjected to symmetric interaction forces from neighboring solvent molecules, which cancel each other out. However, molecules at the gas-liquid interface are exposed to interaction forces from solvent molecules aimed towards the liquid bulk, as well as from gas molecules directed towards the gas phase. Since the interaction forces from the gas side are much weaker than those from the liquid side,<sup>2</sup> solvent molecules at the gas-liquid interface are subjected to interaction forces directed towards the liquid interior.

#### Supplementary discussion 2: The calculation of evaporation rate

The value of evaporation rate is obtained by Dalton evaporation empirical formula:

$$\omega = 0.22 \times (E - e) \times \sqrt{1 + 0.32 \times v^2}$$

where  $\omega$  is the evaporation rate (mm/d),  $E$  is the saturated vapor pressure of the solvent (hpa),  $e$  is the vapor pressure above the solution (hpa), and  $v$  is the airflow velocity (m/s). The saturated vapor pressure of PhMe at 25°C is about 2.67 Kpa, which represents the  $E$  value. To simplify the calculation process, the value of  $e$  can be approximated as the saturated vapor pressure of PhMe multiplied by the relative humidity (40%,  $e = E \times 40\%$ ). The airflow velocity  $v$  can be measured by an anemometer.

#### Supplementary discussion 3: The reason for using solvent vapor annealing as a post-treatment in verifying the effect of different evaporation rates on molecular crystallization

Thermal annealing (TA) and solvent vapor annealing (SVA) as the most common post-treatment applied in OSCs, which are mainly used to form suitable phase separation and promote molecular crystallization. For TA, the free energy of organic molecules decreases during this process, and the intermolecular assembly will be more orderly,

thus improving the molecular crystallinity. For SVA, the organic molecular is exposed to an environment saturated with solvent vapor that diffuse into the organic molecular, inducing a re-assembly of molecular via strong solvent-molecular interactions. This interactions can promote crystal growth and lead to an increase in crystal size, which is beneficial for amplifying the crystallization distinction under different evaporation rates.

#### Supplementary discussion 4: The calculation of energy loss

To clarify the origin of increased  $V_{oc}$  value in the RS-based device, energy loss ( $E_{loss}$ ) analysis was performed based on the detailed balance theory. The  $E_{loss}$  could be classified into three different constituents ( $E_{loss} = E_g - qV_{oc} = \Delta E_1 + \Delta E_2 + \Delta E_3$ ), where  $E_g$ ,  $\Delta E_1$ ,  $\Delta E_2$  and  $\Delta E_3$  denote the optical bandgap, thermodynamic loss, blackbody radiation-induced loss and non-radiative recombination loss, respectively. As presented in Fig. S19, SI, the  $E_g$  of the RT-, HT- and RS-based blend films are 1.43, 1.44 and 1.46 eV, respectively, where  $E_g$ s were obtained from the derivative of the EQE spectra.<sup>3</sup> The resulting  $E_{loss}$  of RS-based device (0.565 eV) is lower than those of the RT- and HT-based devices (0.585 and 0.573 eV, respectively), showing reduced charge recombination loss. Given that all devices showed similar  $\Delta E_1$  and  $\Delta E_2$  values (Fig. S19 and Table S14, SI), the marked  $V_{oc}$  differences primarily arise from  $\Delta E_3$ .

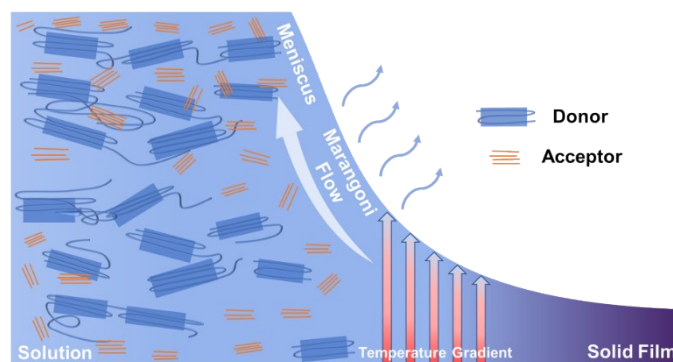

**Fig. S1** The schematic illustration of the Marangoni effect at high temperature.

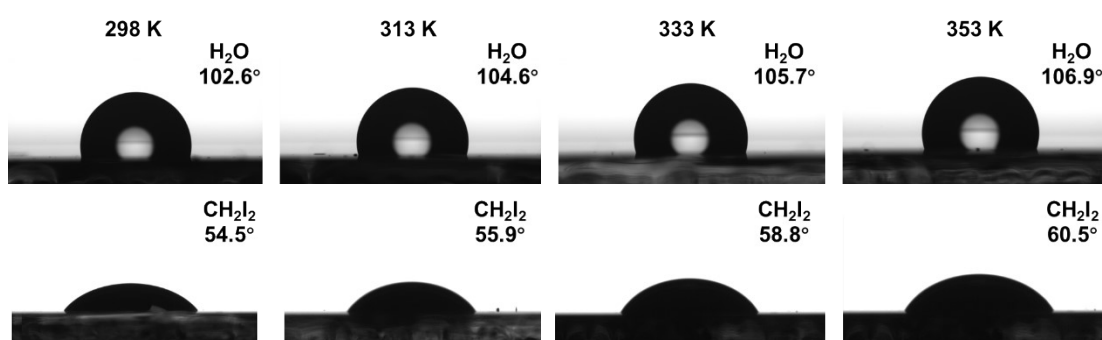

**Fig. S2** The images of the water droplet contact angles and diiodomethane droplet contact angles on the surfaces of blend films at different substrate temperatures.

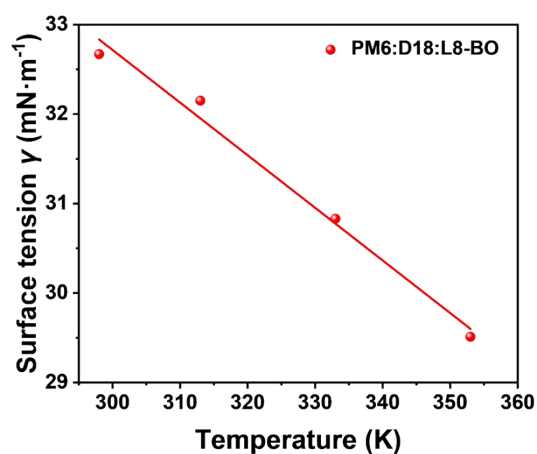

**Fig. S3** The surface tension  $\gamma$  versus substrate temperatures by a linear relationship for PM6:D18:L8-BO. The slope of curve is -0.059.

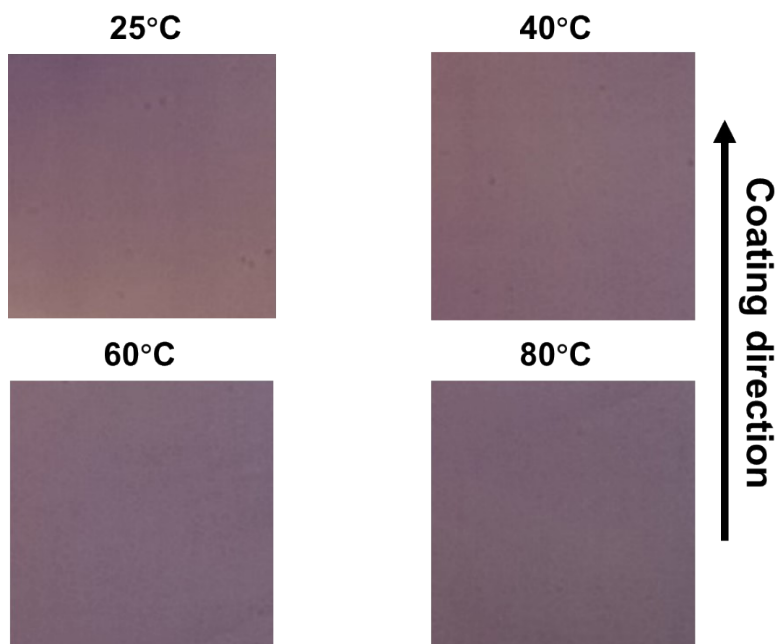

**Fig. S4** Photographs of active layer films at different substrate temperatures captured using a digital camera with macro-lens.

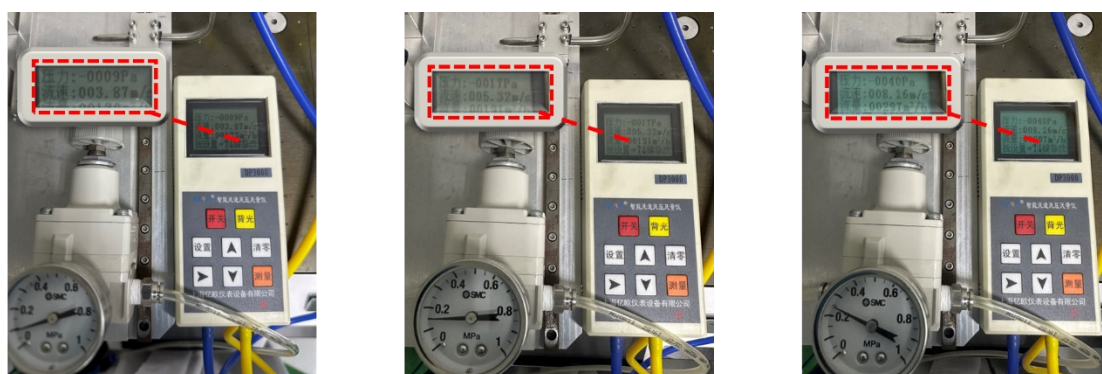

**Fig. S5** The measurement of airflow velocities using an anemometer.

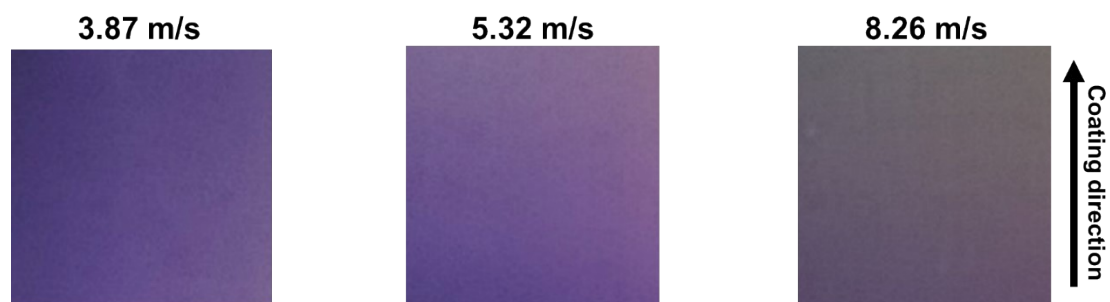

**Fig. S6** Photographs of active layer films under different airflow velocities captured using a digital camera with macro-lens.

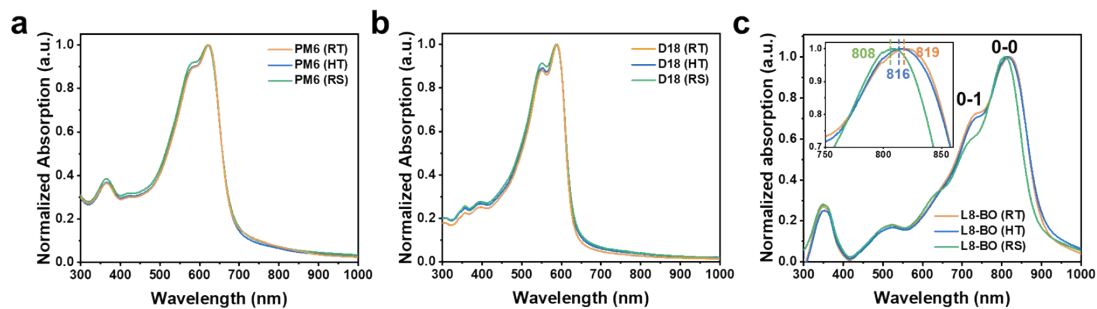

**Fig. S7** Normalized UV-vis absorption spectra of **a)** PM6, **b)** D18, and **c)** L8-BO films fabricated using different processing methods.

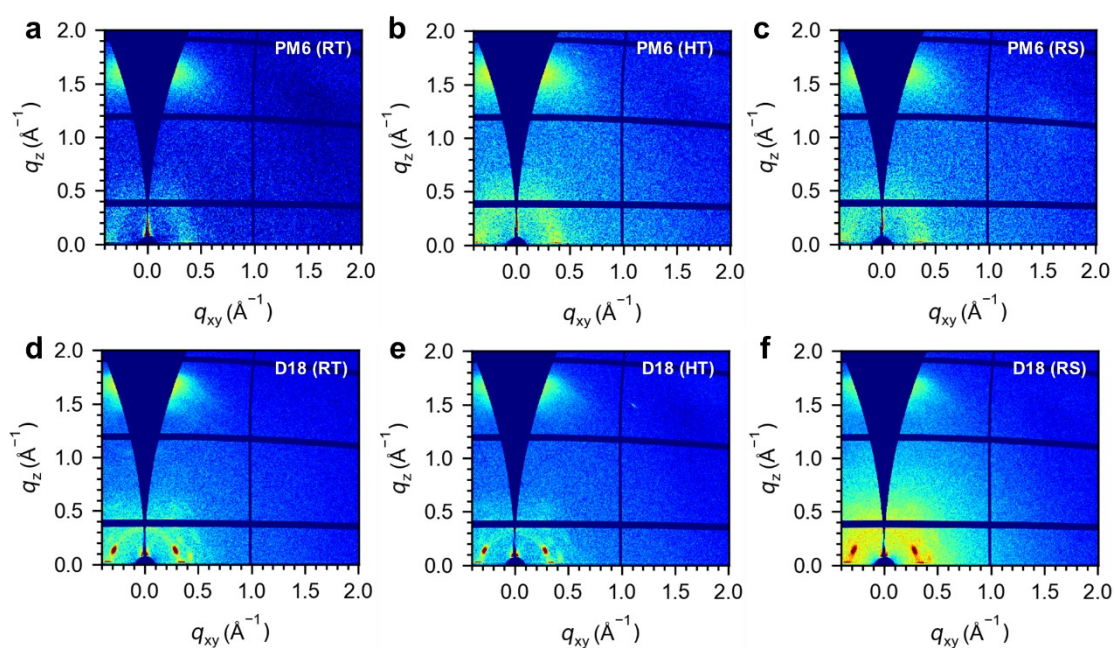

**Fig. S8** 2D GIWAXS patterns of the **a-c)** PM6 and **d-f)** D18 films fabricated using different processing methods.

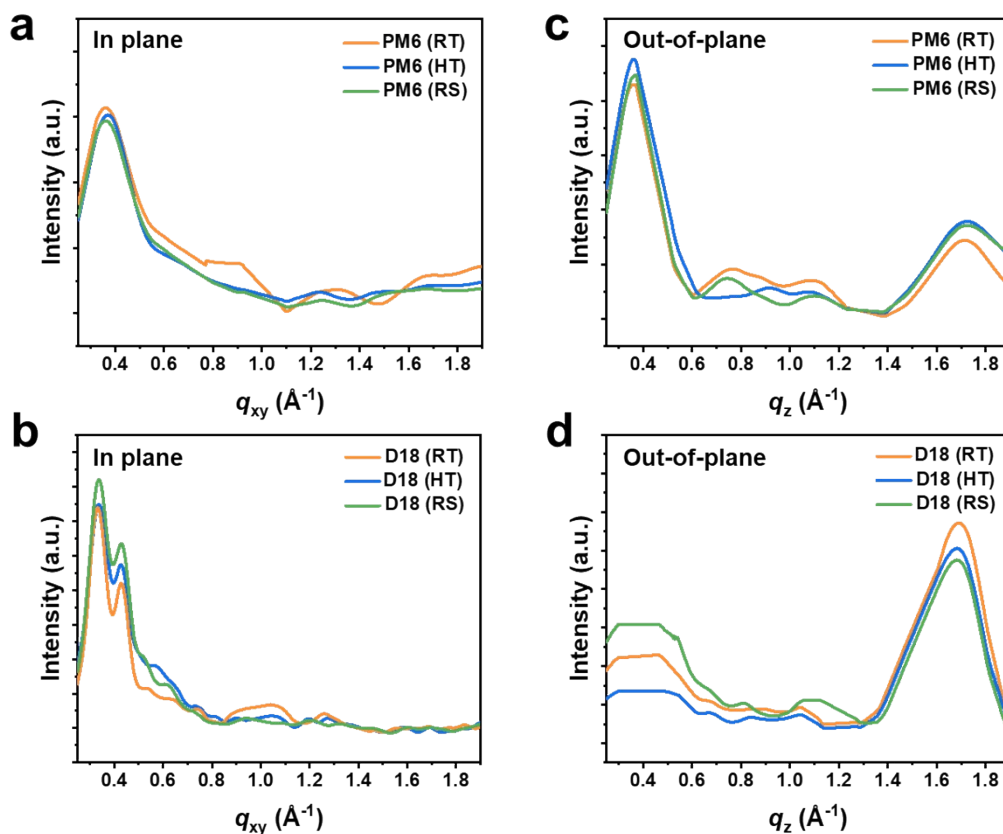

**Fig. S9** Integrated scattering profiles for PM6 and D18 films, fabricated using different processing methods, along the **a-b)** IP and **c-d)** OOP directions.

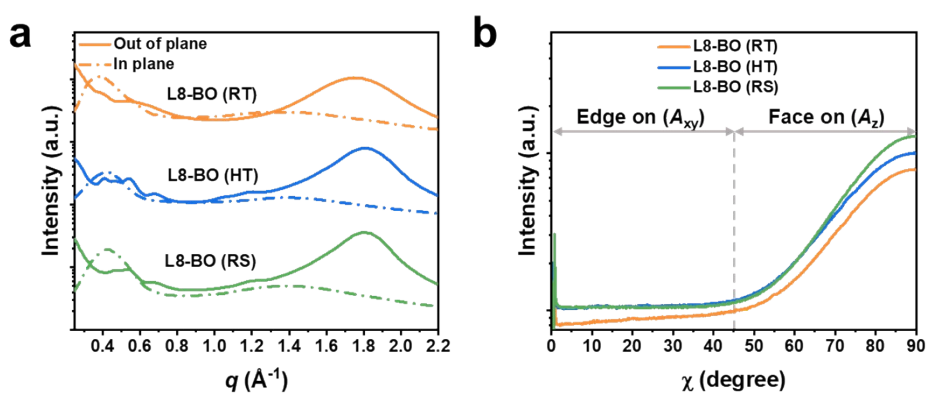

**Fig. S10 a)** Integrated scattering profiles for L8-BO films, fabricated using different processing methods, along the IP and OOP directions. **b)** Corresponding pole Figures extracted from the (010) diffraction patterns for L8-BO films.

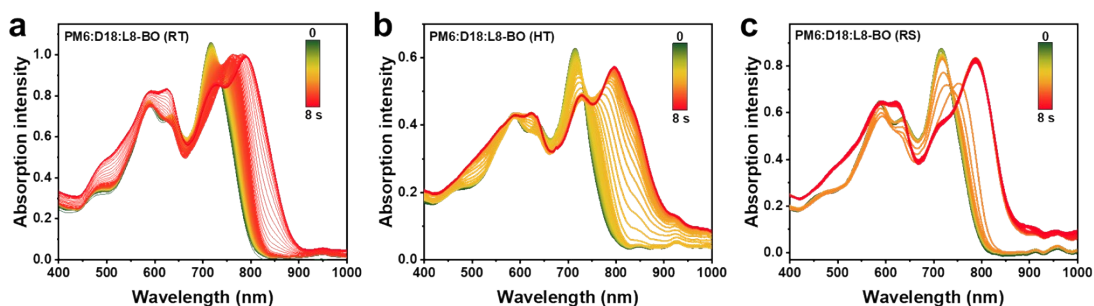

**Fig. S11** *In-situ* UV-vis absorption of **a)** PM6:D18:L8-BO (RT), **b)** PM6:D18:L8-BO (HT) and **c)** PM6:D18:L8-BO (RS) evolution from the solution to the film.

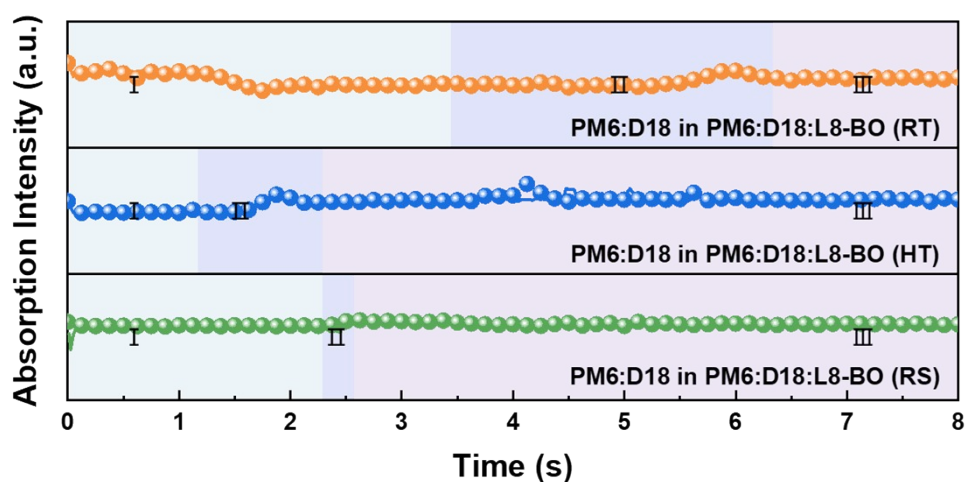

**Fig. S12** Changes in the maximum absorption peak ( $\sim 620$  nm) intensity of PM6:D18 in PM6:D18:L8-BO.

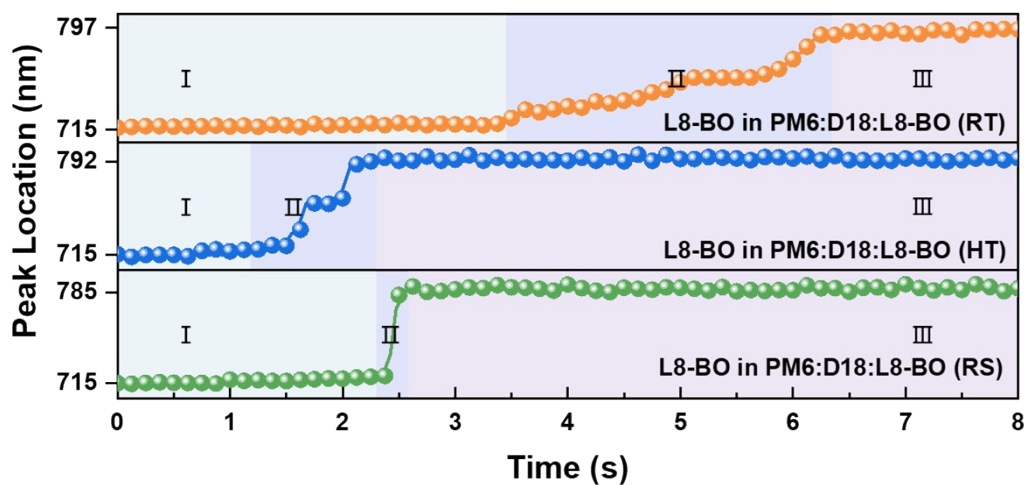

**Fig. S13** Changes in the peak location (from 715 nm to  $\sim 790$  nm) of L8-BO in PM6:D18:L8-BO fabricated using different processing methods.

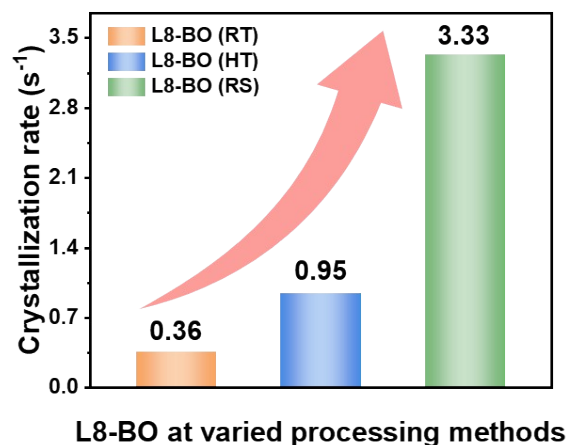

**Fig. S14** Crystallization rate of L8-BO in PM6:D18:L8-BO fabricated using different processing methods.

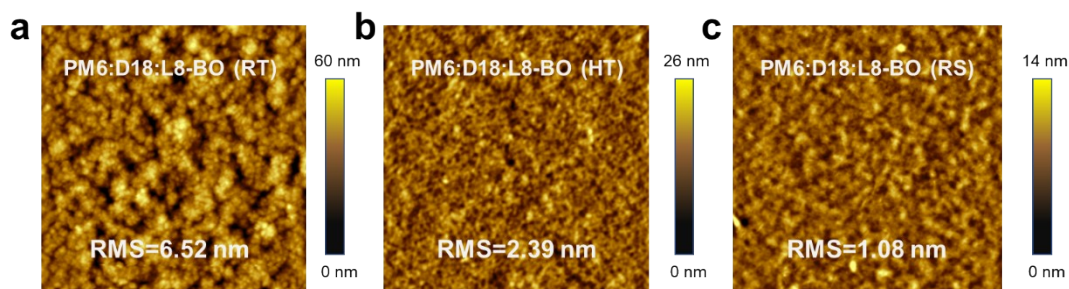

**Fig. S15** AFM height images of PM6:D18:L8-BO active layer films ( $5 \times 5 \mu m$ ) fabricated using different processing methods.

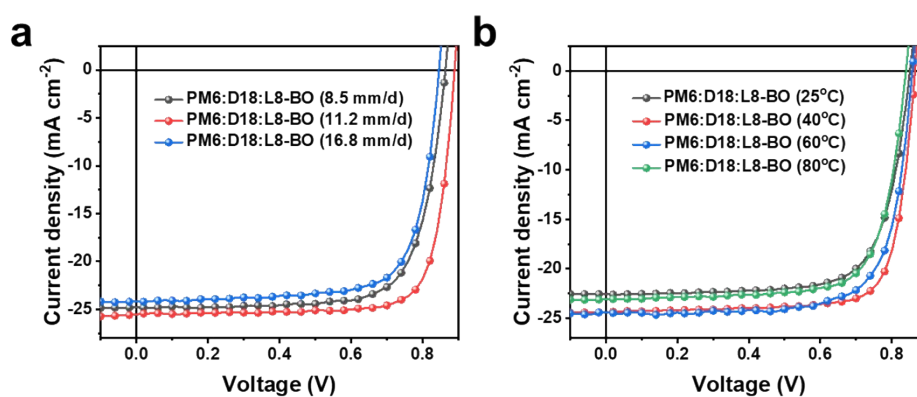

**Fig. S16**  $J$ - $V$  curves of PM6:D18:L8-BO at different **a)** evaporation rates and **b)** substrate temperatures under AM1.5G illumination with an intensity of  $100 \text{ mW cm}^{-2}$ .

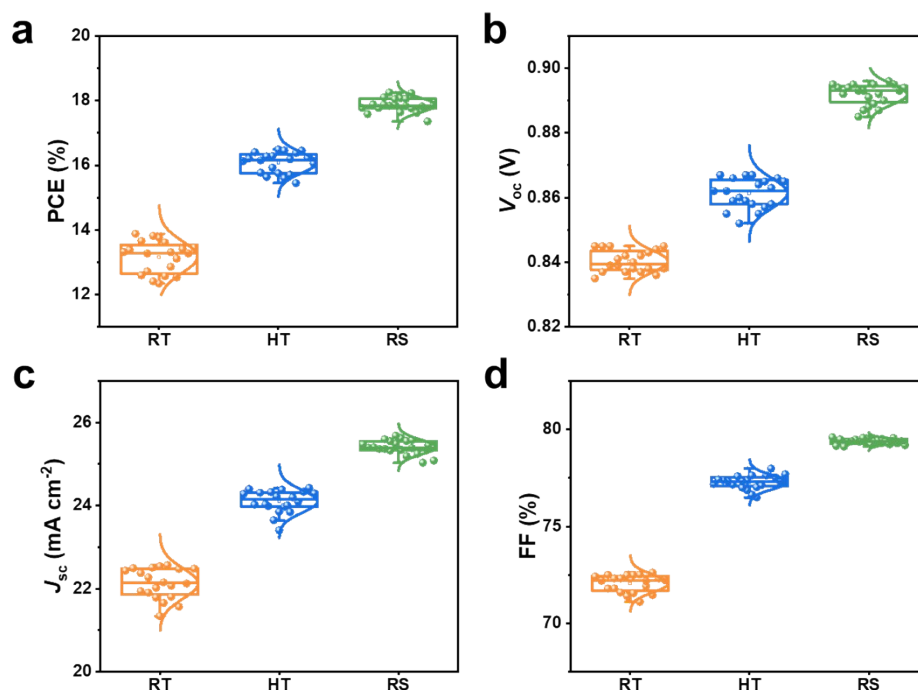

**Fig. S17** Photovoltaic parameters statistics distribution of **a)** PCE, **b)**  $V_{oc}$ , **c)**  $J_{sc}$  and **d)** FF for the RT-, HT- and RS-based devices (20 individual devices were collected from the same batch).

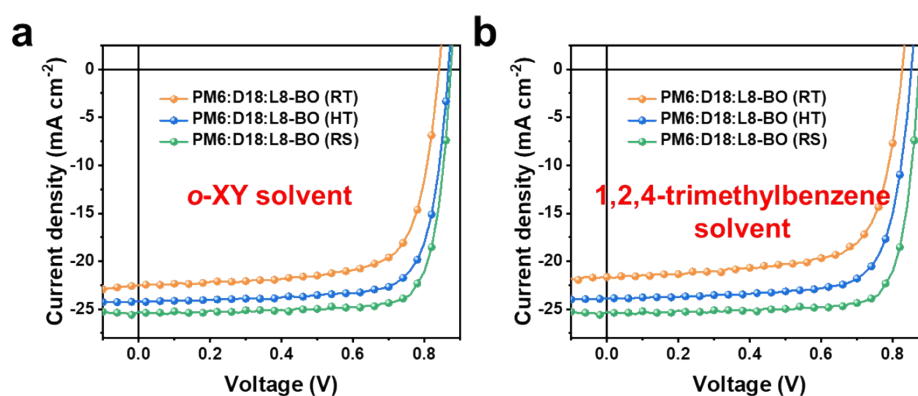

**Fig. S18**  $J-V$  curves of **a)** PM6:D18:L8-BO (*o*-XY) and **b)** PM6:D18:L8-BO (1,2,4-trimethylbenzene) based OSCs, subjected to various processing methods, under AM1.5G illumination with an intensity of 100 mW cm<sup>-2</sup>.

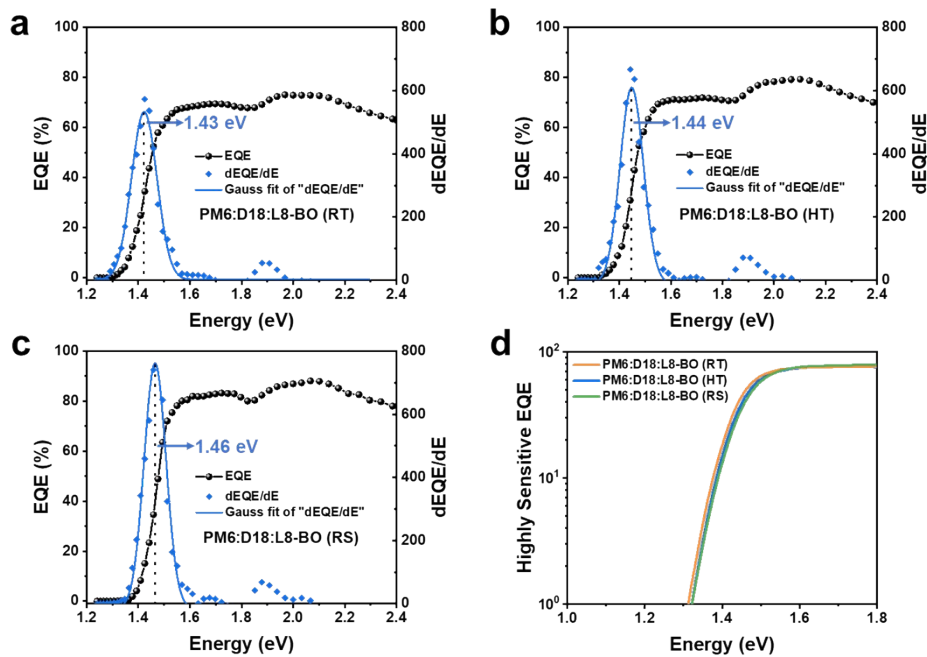

**Fig. S19** Calculation of the optical bandgap of **a)** PM6:D18:L8-BO (RT), **b)** PM6:D18:L8-BO (HT) and **c)** PM6:D18:L8-BO (RS) by using the maximum point of the derivative of the EQE spectra ( $dEQE/dE$ ). **d)** Highly sensitive EQE of PM6:D18:L8-BO-based OSCs subjected to various processing methods.

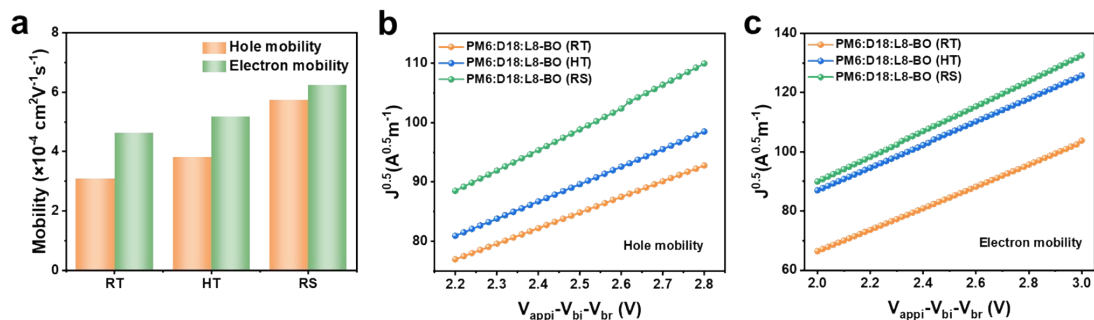

**Fig. S20 a)** Histogram of hole and electron mobilities for PM6:D18:L8-BO fabricated using different processing methods. **b-c)** Corresponding hole and electron mobility plots.

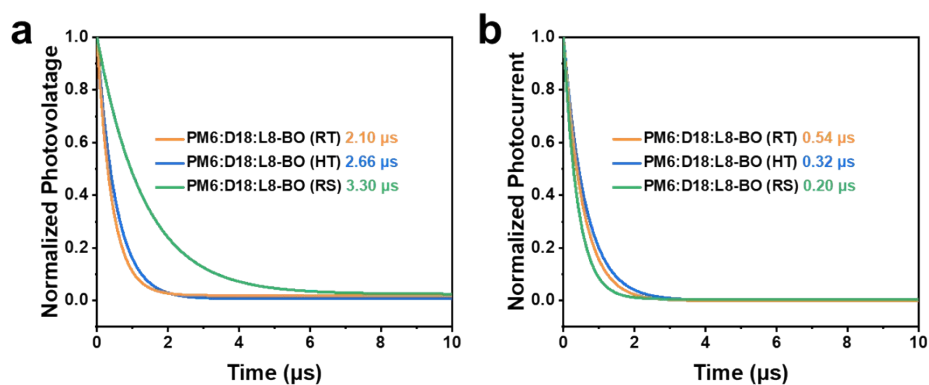

**Fig. S21** a) TPV and b) TPC of PM6:D18:L8-BO fabricated using different processing methods.

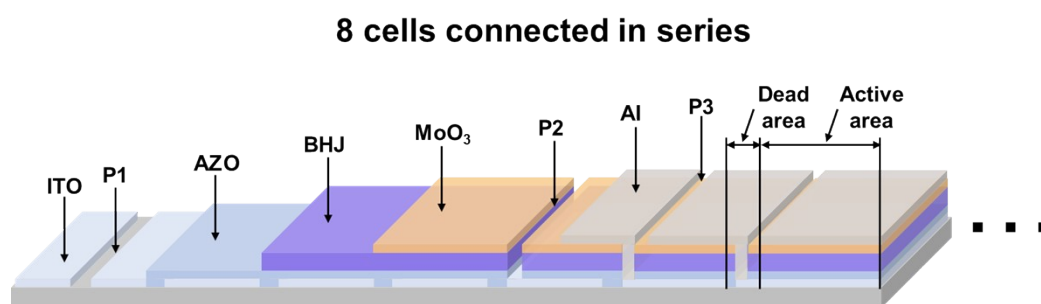

**Fig. S22** Schematic illustration of the large-area module consisting of eight sub-cells ( $4.2 \times 0.4655 \text{ cm}^2$ ) monolithically in series by ITO-to-Al interconnects.

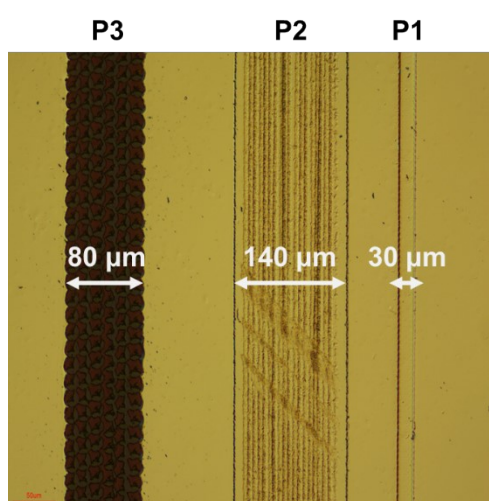

**Fig. S23** Optical microscopic image of the P1, P2, and P3 etched lines for module fabrication. The width of P1, P2, and P3 is  $30 \mu\text{m}$ ,  $140 \mu\text{m}$ , and  $80 \mu\text{m}$ , respectively.

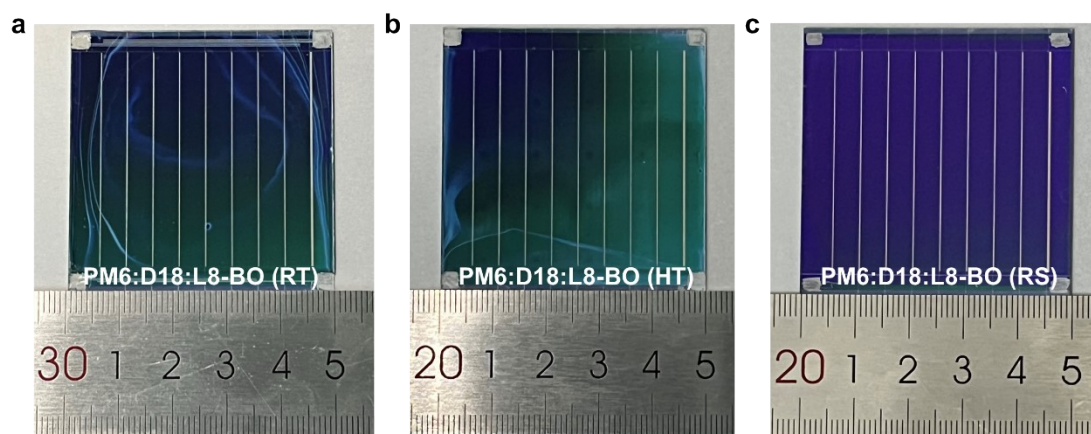

**Fig. S24** The photograph of the blade-coated 15.64 cm<sup>2</sup> OSC modules subjected to various processing methods on 5×5 cm<sup>2</sup> substrate.

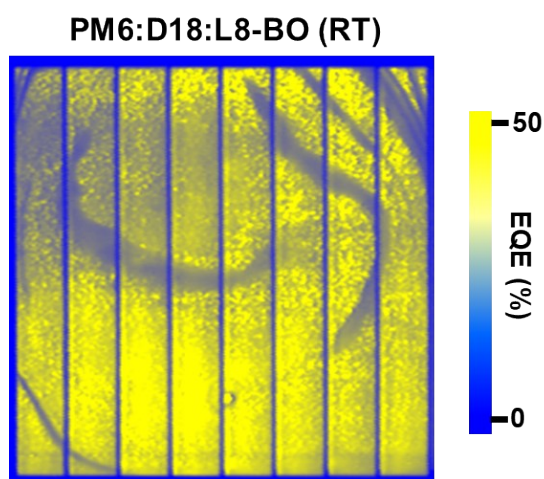

**Fig. S25** The LBIC mapping image of the RT-based OSC module. The color scale bar represents the EQE intensity.

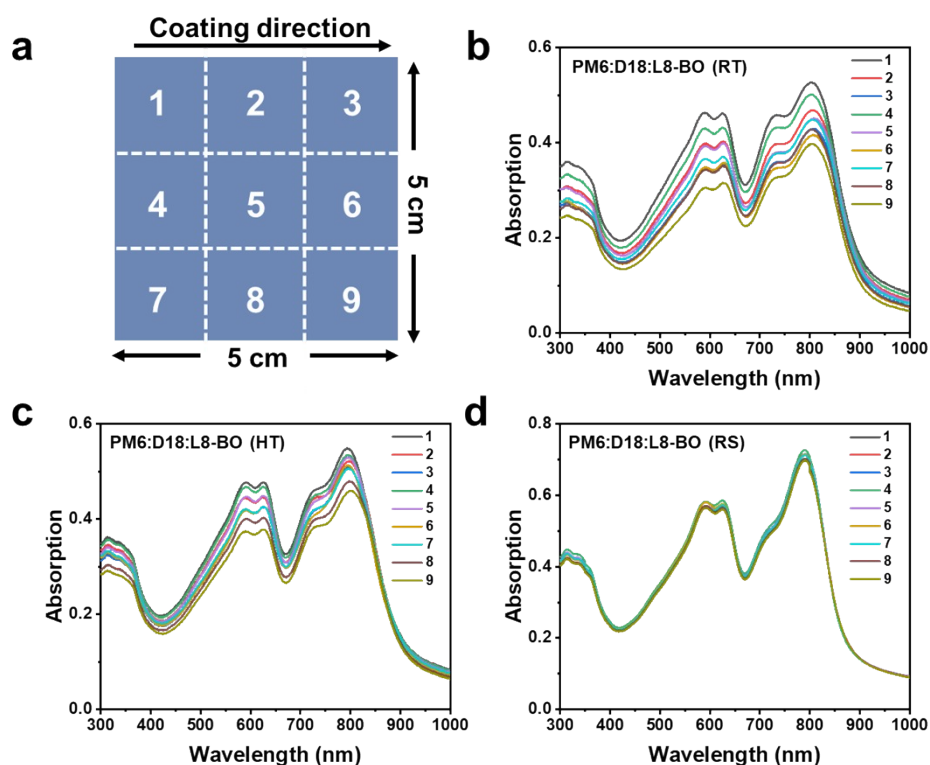

**Fig. S26** a) Schematic illustration of nine platforms on a  $5 \times 5 \text{ cm}^2$  substrate. The UV-vis absorption spectra of nine platforms in **b)** PM6:D18:L8-BO (RT), **c)** PM6:D18:L8-BO (HT) and **d)** PM6:D18:L8-BO (RS) films, respectively.

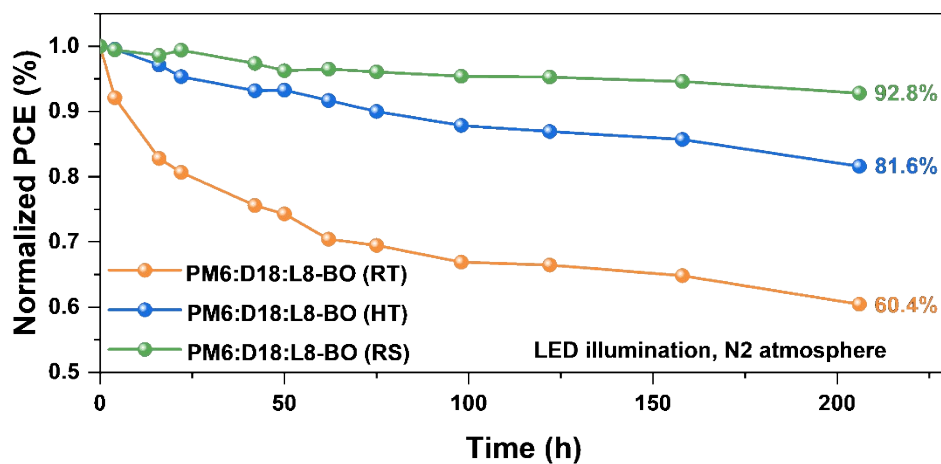

**Fig. S27** The light stability of RT-, HT- and RS-based OSC modules in  $\text{N}_2$  atmosphere under the illumination of a LED.

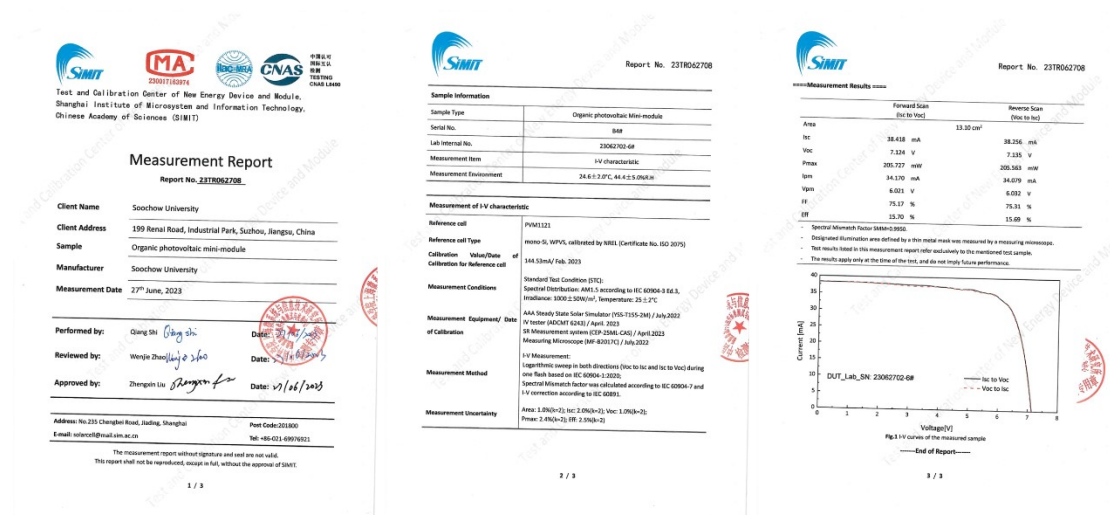

**Fig. S28** Certification report for RS-based large-area module by SIMIT in Shanghai, China.

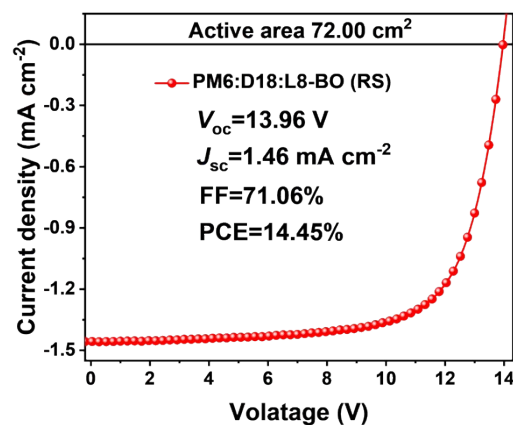

**Fig. S29**  $J$ - $V$  curve of the 72.00 cm<sup>2</sup> OSC module under AM1.5G illumination with an intensity of 100 mW cm<sup>-2</sup>.

**Table S1.** Water and diiodomethane contact angles on the PM6:D18:L8-BO films at different substrate temperatures and the corresponding surface tension calculated with equations of state (Neumann).

| Temperature (K) | Water contact angle (°) | Diiodomethane contact angle (°) | Surface tension $\gamma$ (mN·m <sup>-1</sup> ) | $d\gamma/dT$ (mN·m <sup>-1</sup> ·K <sup>-1</sup> ) |
|-----------------|-------------------------|---------------------------------|------------------------------------------------|-----------------------------------------------------|
| 298             | 102.6                   | 54.5                            | 32.67                                          | -0.059                                              |
| 313             | 104.6                   | 55.9                            | 32.15                                          |                                                     |
| 333             | 105.7                   | 58.5                            | 30.83                                          |                                                     |
| 353             | 107.0                   | 60.5                            | 29.51                                          |                                                     |

**Table S2.** The values of  $\Delta T$ ,  $L$ ,  $\mu$ ,  $\alpha$ , and  $d\gamma/dT$  measured at different substrate temperatures.

| $\Delta T^a$ (K) | $L$ (m)              | $\mu$ (mPa·s) | $\alpha$ (m <sup>2</sup> ·s <sup>-1</sup> ) | $d\gamma/dT$ (mN·m <sup>-1</sup> ·K <sup>-1</sup> ) | Marangoni number |
|------------------|----------------------|---------------|---------------------------------------------|-----------------------------------------------------|------------------|
| 0                | $9.8 \times 10^{-5}$ | 10.68         | $1.20 \times 10^{-7}$                       | -0.059                                              | 0                |
| 15               |                      | 7.37          | $1.14 \times 10^{-7}$                       |                                                     | 103              |
| 35               |                      | 4.52          | $1.06 \times 10^{-7}$                       |                                                     | 422              |
| 55               |                      | 2.41          | $0.99 \times 10^{-7}$                       |                                                     | 1332             |

<sup>a)</sup> The bottom temperature of the wet film is assumed to be the substrate temperature (as glass has high thermal conductivity), while the top temperature is room temperature (the solution temperature matches room temperature during coating).

**Table S3.** Calculation of evaporation rate at different airflow velocity.

| Airflow velocity (m/s) | Evaporation rate (mm/d) |
|------------------------|-------------------------|
| 3.87                   | 8.5                     |
| 5.32                   | 11.2                    |
| 8.26                   | 16.8                    |

**Table S4.** The  $d$ -spacings and CCLs of IP (100) diffractions for PM6, D18 and L8-BO neat films fabricated using different processing methods.

| Neat film  | (100) Peak position ( $\text{\AA}^{-1}$ ) | <i>d</i> -spacing ( $\text{\AA}$ ) | CCL ( $\text{\AA}$ ) |
|------------|-------------------------------------------|------------------------------------|----------------------|
| PM6 (RT)   | 0.35                                      | 18.15                              | 46.71                |
| PM6 (HT)   | 0.36                                      | 17.46                              | 47.79                |
| PM6 (RS)   | 0.34                                      | 18.32                              | 51.47                |
| D18 (RT)   | 0.34                                      | 18.80                              | 70.71                |
| D18 (HT)   | 0.33                                      | 18.96                              | 72.00                |
| D18 (RS)   | 0.34                                      | 18.81                              | 69.17                |
| L8-BO (RT) | 0.39                                      | 16.19                              | 30.92                |
| L8-BO (HT) | 0.42                                      | 14.99                              | 34.09                |
| L8-BO (RS) | 0.43                                      | 14.72                              | 43.53                |

**Table S5.** The *d*-spacings and CCLs of OOP (010) diffractions for PM6, D18 and L8-BO neat films fabricated using different processing methods.

| Neat film  | (010) Peak position ( $\text{\AA}^{-1}$ ) | <i>d</i> -spacing ( $\text{\AA}$ ) | CCL ( $\text{\AA}$ ) |
|------------|-------------------------------------------|------------------------------------|----------------------|
| PM6 (RT)   | 1.69                                      | 3.73                               | 24.48                |
| PM6 (HT)   | 1.69                                      | 3.72                               | 24.95                |
| PM6 (RS)   | 1.68                                      | 3.73                               | 25.06                |
| D18 (RT)   | 1.67                                      | 3.77                               | 40.81                |
| D18 (HT)   | 1.67                                      | 3.76                               | 41.22                |
| D18 (RS)   | 1.67                                      | 3.76                               | 42.36                |
| L8-BO (RT) | 1.76                                      | 3.57                               | 22.45                |
| L8-BO (HT) | 1.80                                      | 3.50                               | 27.54                |
| L8-BO (RS) | 1.80                                      | 3.49                               | 29.37                |

**Table S6.** The ratio of face-on ( $A_z$ ) and edge-on orientation ( $A_{xy}$ ) for L8-BO neat films fabricated using different processing methods.

| Neat film  | $A_z$ (%) | $A_{xy}$ (%) | $A_z/A_{xy}$ |
|------------|-----------|--------------|--------------|
| L8-BO (RT) | 79.75     | 20.25        | 3.94         |
| L8-BO (HT) | 80.76     | 19.24        | 4.20         |

|            |       |       |      |
|------------|-------|-------|------|
| L8-BO (RS) | 83.27 | 16.73 | 4.98 |
|------------|-------|-------|------|

**Table S7.** The  $d$ -spacings and CCLs of IP (100) diffractions for PM6:D18:L8-BO blend films fabricated using different processing methods.

| Active layer       | (100) Peak position ( $\text{\AA}^{-1}$ ) | $d$ -spacing ( $\text{\AA}$ ) | CCL ( $\text{\AA}$ ) |
|--------------------|-------------------------------------------|-------------------------------|----------------------|
| PM6:D18:L8-BO (RT) | 0.31                                      | 19.88                         | 34.71                |
| PM6:D18:L8-BO (HT) | 0.33                                      | 19.16                         | 43.85                |
| PM6:D18:L8-BO (RS) | 0.33                                      | 18.93                         | 57.73                |

**Table S8.** The  $d$ -spacings and CCLs of OOP (010) diffractions for PM6:D18:L8-BO blend films fabricated using different processing methods.

| Active layer       | (010) Peak position ( $\text{\AA}^{-1}$ ) | $d$ -spacing ( $\text{\AA}$ ) | CCL ( $\text{\AA}$ ) |
|--------------------|-------------------------------------------|-------------------------------|----------------------|
| PM6:D18:L8-BO (RT) | 1.75                                      | 3.59                          | 21.28                |
| PM6:D18:L8-BO (HT) | 1.77                                      | 3.55                          | 24.05                |
| PM6:D18:L8-BO (RS) | 1.78                                      | 3.53                          | 31.81                |

**Table S9.** The ratio of face-on ( $A_z$ ) and edge-on orientation ( $A_{xy}$ ) for PM6:D18:L8-BO blend films fabricated using different processing methods.

| Active layer       | $A_z$ (%) | $A_{xy}$ (%) | $A_z/A_{xy}$ |
|--------------------|-----------|--------------|--------------|
| PM6:D18:L8-BO (RT) | 79.50     | 20.50        | 3.98         |
| PM6:D18:L8-BO (HT) | 80.41     | 19.59        | 4.10         |
| PM6:D18:L8-BO (RS) | 81.57     | 18.43        | 4.43         |

**Table S10.** Photovoltaic parameters of PM6:D18:L8-BO at different evaporation rates under AM1.5G 100 mW  $\text{cm}^{-2}$  illumination.

| Evaporation rate (mm/d) | $V_{oc}$ (V) | $J_{sc}$ (mA $\text{cm}^{-2}$ ) | FF (%) | PCE (%) |
|-------------------------|--------------|---------------------------------|--------|---------|
| 8.5                     | 0.865        | 24.77                           | 74.69  | 16.00   |

|      |       |       |       |       |
|------|-------|-------|-------|-------|
| 11.2 | 0.895 | 25.62 | 79.50 | 18.22 |
| 16.8 | 0.847 | 24.16 | 74.51 | 15.26 |

**Table S11.** Photovoltaic parameters of PM6:D18:L8-BO at different substrate temperatures under AM1.5G 100 mW cm<sup>-2</sup> illumination.

| Substrate temperature (°C) | $V_{oc}$ (V) | $J_{sc}$ (mA cm <sup>-2</sup> ) | FF (%) | PCE (%) |
|----------------------------|--------------|---------------------------------|--------|---------|
| 25                         | 0.845        | 22.54                           | 72.50  | 13.82   |
| 40                         | 0.867        | 24.43                           | 77.97  | 16.50   |
| 60                         | 0.857        | 24.44                           | 74.07  | 15.52   |
| 80                         | 0.833        | 22.98                           | 74.81  | 14.59   |

**Table S12.** Photovoltaic parameters of PM6:D18:L8-BO (*o*-XY) based OSCs, subjected to various processing methods, under AM1.5G 100 mW cm<sup>-2</sup> illumination.

| Active layer       | $V_{oc}$ (V) | $J_{sc}$ (mA cm <sup>-2</sup> ) | FF (%) | PCE (%) |
|--------------------|--------------|---------------------------------|--------|---------|
| PM6:D18:L8-BO (RT) | 0.840        | 22.68                           | 71.60  | 13.64   |
| PM6:D18:L8-BO (HT) | 0.864        | 24.23                           | 76.58  | 16.03   |
| PM6:D18:L8-BO (RS) | 0.871        | 25.42                           | 79.78  | 17.65   |

**Table S13.** Photovoltaic parameters of PM6:D18:L8-BO (1,2,4-trimethylbenzene) based OSCs, subjected to various processing methods, under AM1.5G 100 mW cm<sup>-2</sup> illumination.

| Active layer       | $V_{oc}$ (V) | $J_{sc}$ (mA cm <sup>-2</sup> ) | FF (%) | PCE (%) |
|--------------------|--------------|---------------------------------|--------|---------|
| PM6:D18:L8-BO (RT) | 0.824        | 21.70                           | 70.62  | 12.63   |
| PM6:D18:L8-BO (HT) | 0.850        | 23.89                           | 75.22  | 15.27   |
| PM6:D18:L8-BO (RS) | 0.869        | 24.99                           | 79.10  | 17.17   |

**Table S14.** Statistical energy losses of PM6:D18:L8-BO fabricated using different processing methods.

| Active layer       | $E_g$<br>(eV) | $E_{\text{loss}}$<br>(eV) | $\text{EQE}_{\text{EL}}$ | $\Delta E_1$<br>(eV) | $\Delta E_2$<br>(eV) | $\Delta E_3$<br>(eV) |
|--------------------|---------------|---------------------------|--------------------------|----------------------|----------------------|----------------------|
| PM6:D18:L8-BO (RT) | 1.43          | 0.585                     | $1.8 \times 10^{-5}$     | 0.266                | 0.038                | 0.281                |
| PM6:D18:L8-BO (HT) | 1.44          | 0.573                     | $3.7 \times 10^{-5}$     | 0.267                | 0.044                | 0.262                |
| PM6:D18:L8-BO (RS) | 1.45          | 0.555                     | $7.2 \times 10^{-5}$     | 0.268                | 0.051                | 0.245                |

**Table S15.** The hole and electron mobilities for PM6:D18:L8-BO fabricated using different processing methods.

| Active layer       | Hole mobility<br>( $\mu_h$ , $\text{cm}^2\text{V}^{-1}\text{s}^{-1}$ ) | Electron mobility<br>( $\mu_e$ , $\text{cm}^2\text{V}^{-1}\text{s}^{-1}$ ) | $\mu_e/\mu_h$ |
|--------------------|------------------------------------------------------------------------|----------------------------------------------------------------------------|---------------|
| PM6:D18:L8-BO (RT) | $3.08 \times 10^{-4}$                                                  | $4.64 \times 10^{-4}$                                                      | 1.51          |
| PM6:D18:L8-BO (HT) | $3.80 \times 10^{-4}$                                                  | $5.18 \times 10^{-4}$                                                      | 1.36          |
| PM6:D18:L8-BO (RS) | $5.74 \times 10^{-4}$                                                  | $6.23 \times 10^{-4}$                                                      | 1.09          |

**Table S16.** The summary of PCEs of the green-solvent-processed large-area modules with active layer areas over  $10 \text{ cm}^2$ .

| Area<br>( $\text{cm}^2$ ) | PCE<br>(%) | Active layer    | Processing<br>solvent             | Ref.                                     |
|---------------------------|------------|-----------------|-----------------------------------|------------------------------------------|
| 16.5                      | 13.84      | PM6:PY-82:PY-DT | <i>o</i> -XY                      | S1. Adv. Mater. 2023, 35, 2208165        |
| 18                        | 14.4       | PM6:DTY6        | <i>o</i> -XY                      | S2. Joule 2020, 4, 2004                  |
| 18.73                     | 14.79      | PM6:BTP-BO-4Cl  | PhMe                              | S3. Adv. Mater. 2022, 34, 2110569        |
| 20.4                      | 10.13      | TPD-3F:IT-4F    | <i>o</i> -XY                      | S4. Joule 2020, 4, 189                   |
| 21                        | 15.4       | D18:DTC11       | Carbon disulfide and <i>o</i> -XY | S5. Adv. Energy Mater. 2023, 13, 2302273 |
| 25.2                      | 14.42      | PM6:CH7         | <i>o</i> -XY                      | S6. Solar RRL 2023, 7, 2300029           |
| 25.21                     | 14.07      | PM6:BTP-eC9     | PhMe                              | S7. Adv. Funct. Mater. 2022, 32, 2110209 |
| 28.82                     | 12.64      | PM6/Y6          | <i>o</i> -XY                      | S8. J. Mater. Chem. C 2023, 11, 13263    |

|              |              |                                |              |                                           |
|--------------|--------------|--------------------------------|--------------|-------------------------------------------|
| 30           | 12.2         | PM6:Qx-1                       | <i>o</i> -XY | S9. Adv. Mater. 2023, 35, 2209030         |
| 31.5         | 12.44        | PM6:Y6-hu                      | <i>o</i> -XY | S10. Adv. Energy Mater. 2023, 13, 2203452 |
| 36           | 14.26        | PM6:Y6:BTO:PC <sub>71</sub> BM | Paraxylene   | S11. Nat. Energy 2021, 6, 1045            |
| 46.2         | 13.25        | PM6:G-Trimer                   | <i>o</i> -XY | S12. Joule 2023, 7, 2386                  |
| 54.45        | 11.6         | PTF5:Y6-BO                     | <i>o</i> -XY | S13. Adv. Sci. 2023, 10, 2302376          |
| 55           | 13.88        | PM6:P2:Y7-BO                   | <i>o</i> -XY | S14. Adv. Energy Mater. 2023, 13, 2302538 |
| 55.5         | 9.32         | PTB7-Th:EH-IDTBR:T2-OEHRH      | PhMe         | S15. J. Mater. Chem. A 2020, 8, 10318     |
| 72.25        | 12.78        | PM6:L8-BO:<br>BTP-S8:BTP-S2    | PhMe         | S16. Chem. Eng. J. 2023, 473, 145201      |
| <b>15.64</b> | <b>16.03</b> | <b>PM6:D18:L8-BO</b>           | <b>PhMe</b>  | <b>This work</b>                          |
| <b>72.00</b> | <b>14.45</b> | <b>PM6:D18:L8-BO</b>           | <b>PhMe</b>  | <b>This work</b>                          |

## References

- 1 M. R. Ahmadian-Yazdi and M. Eslamian, *Langmuir*, 2021, **37**, 2596-2606.
- 2 M. Sega, B. Fábíán, G. Horvai and P. Jedlovszky, *J. Phys. Chem. C*, 2016, **120**, 27468-27477.
- 3 Y. Wang, D. Qian, Y. Cui, H. Zhang, J. Hou, K. Vandewal, T. Kirchartz and F. Gao, *Adv. Energy Mater.*, 2018, **8**, 1801352.
